# Supplementary material for: Combining serological and contact data to derive target immunity levels for achieving and maintaining measles elimination
Source: bioRxiv or medRxiv preprint supplement (doi:10.1101/201574), 2019-08-16
Supplement: Supplementary file [file 201574-1.pdf]

# Supplementary Material

Target immunity levels for achieving and maintaining  
measles elimination

Sebastian Funk, Jennifer K. Knapp, Emmaculate Lebo, Susan E. Reef,  
Alya J. Dabbagh, W. John Edmunds, Peter M. Strebel

## Figures

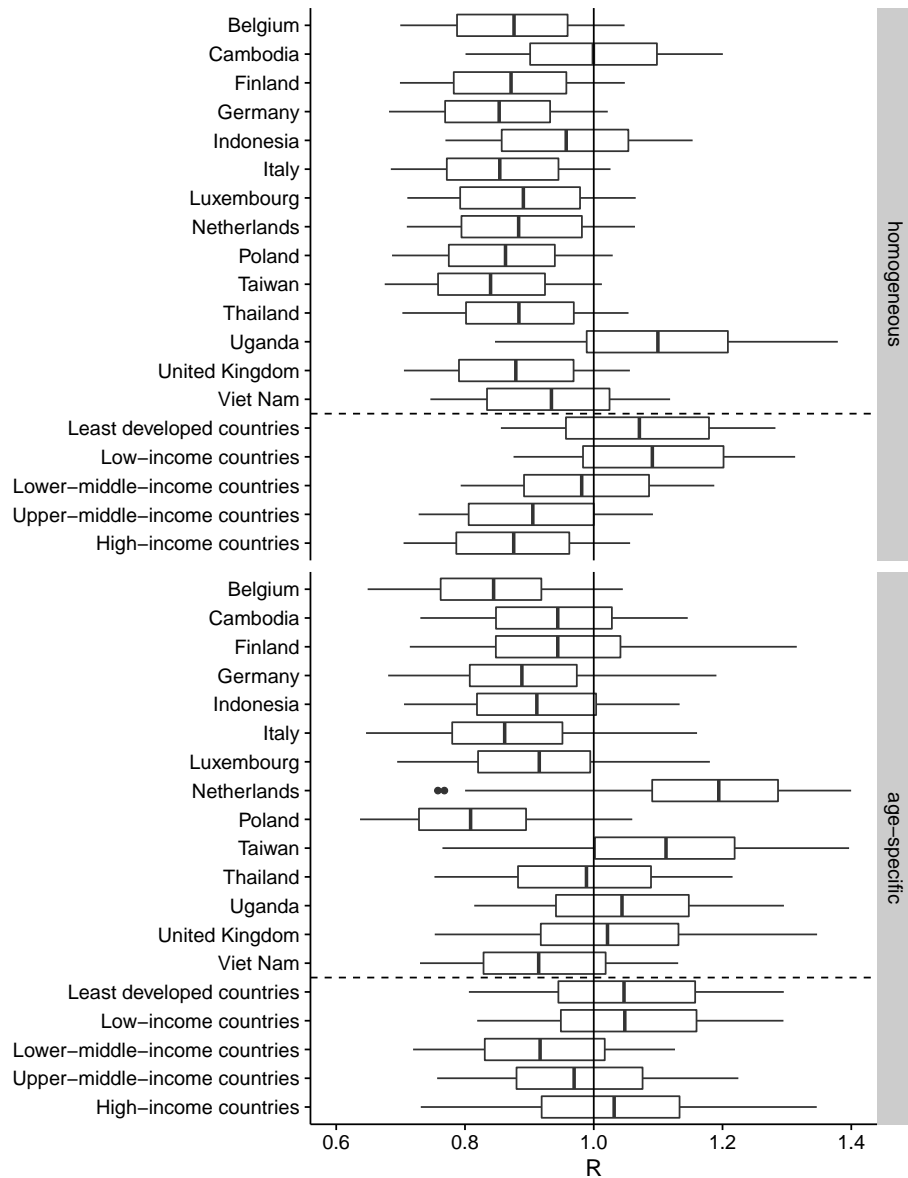

**Figure S1.** Estimates of what the reproduction numbers of measles would be in a scenario of immunity at current target levels, under assumptions of homogeneous (top) versus age-specific (bottom) mixing. A smaller version of this graph with selected countries can be found in the main paper (Fig. 1).

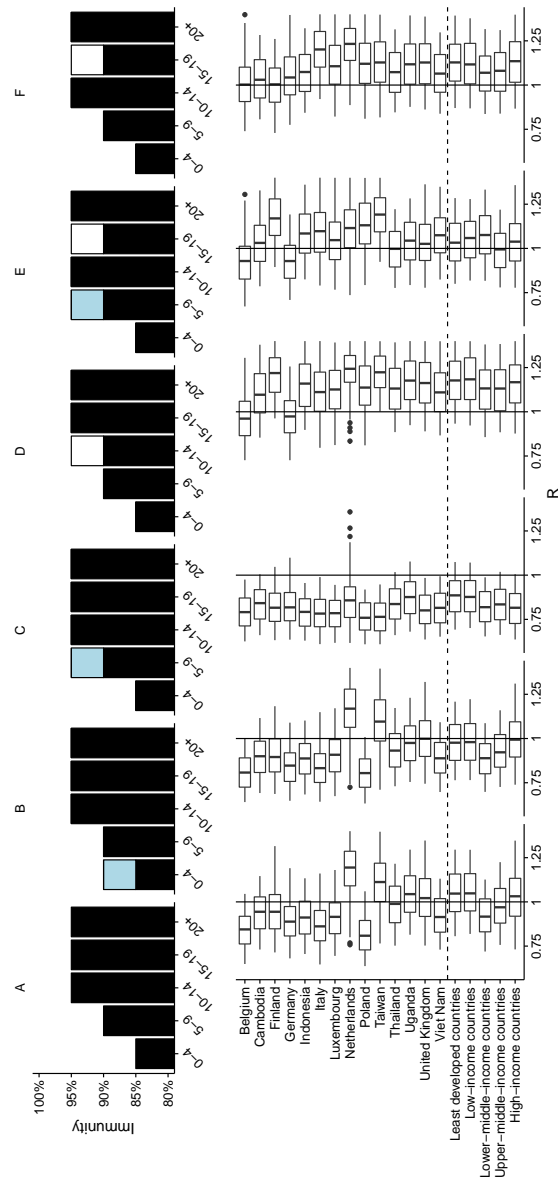

**Figure S2.** Estimates of what the reproduction numbers of measles would be in different scenarios, with age-specific mixing as measured in diary studies. Top: Scenarios of immunity levels. Bottom: Estimated reproduction numbers. Left to right: A) Current target levels. B) 5% higher immunity in under 5 year olds. C) 5% higher immunity in 5–9 year olds. D) 5% lower immunity in 10–14 year olds. E) 5% higher immunity in 5–9 year olds and 5% lower immunity in 15–19 year olds. F) 5% lower immunity in 15–19 year olds. A smaller version of this graph with selected countries can be found in the main paper (Fig. 2).
